# Supplementary material
Source: PubMed Central journal article supplement (PMC528752)
Supplement: pnas_101_45_15998__2.pdf [file pnas_101_45_15998__2.pdf]

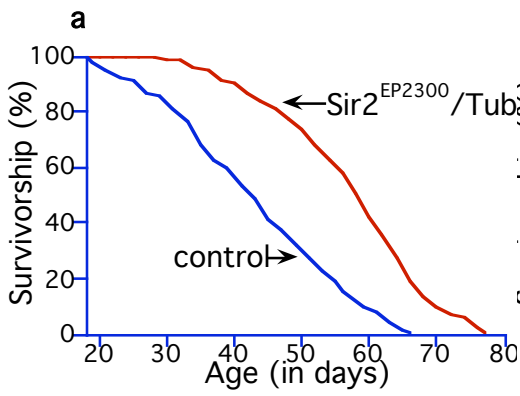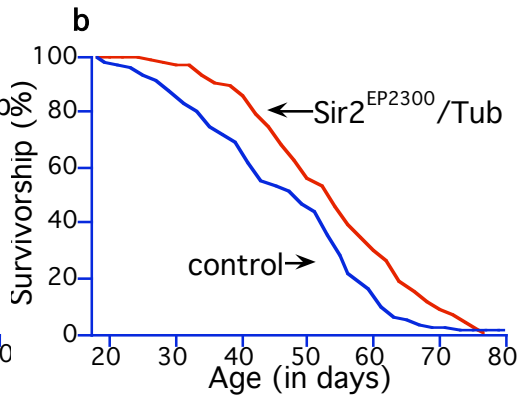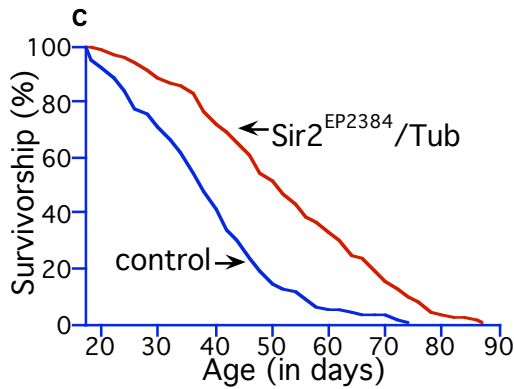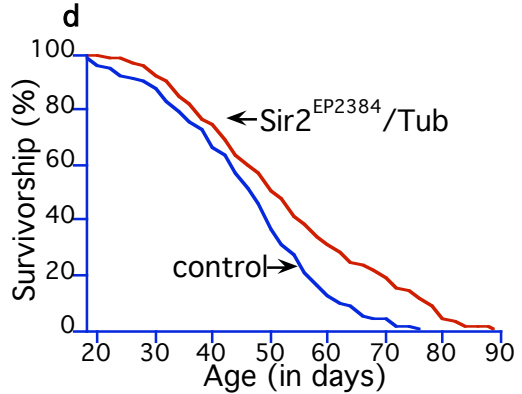

**MEDIAN SURVIVAL  $\pm$  SE AND LOGRANK RESULTS (chi-squared) MEAN and MAXIMAL LIFE SPAN (mean of 10% survival)**

2300/tub vs controls – FEMALES

*Experimentals:* 60  $\pm$  0.944

*Controls:* 43  $\pm$  1.513

chi-squared = 99.364,  $p < 0.0001$

| <u>MEAN SURVIVAL</u> | <u>MAX (mean 10%)</u> |
|----------------------|-----------------------|
| 57                   | 74                    |
| 43                   | 62                    |
| 54                   | 74                    |
| 47                   | 65                    |
| 53                   | 79                    |
| 39                   | 63                    |
| 53                   | 82                    |
| 47                   | 68                    |

57

74

43

62

2300/tub vs. controls – MALES

*Experimentals:* 54  $\pm$  1.064

*Controls:* 49  $\pm$  2.387

chi-squared = 18.735,  $p < 0.0001$

2384/tub vs controls – FEMALES

*Experimentals:* 50  $\pm$  1.992

*Controls:* 38  $\pm$  1.330

chi-squared = 51.429,  $p < 0.0001$

2384/tub vs. controls – MALES

*Experimentals:* 50  $\pm$  1.598

*Controls:* 48  $\pm$  1.210

chi-squared = 18.288,  $p < 0.0001$
