# Supplementary material
Source: PubMed Central journal article supplement (PMC528752)

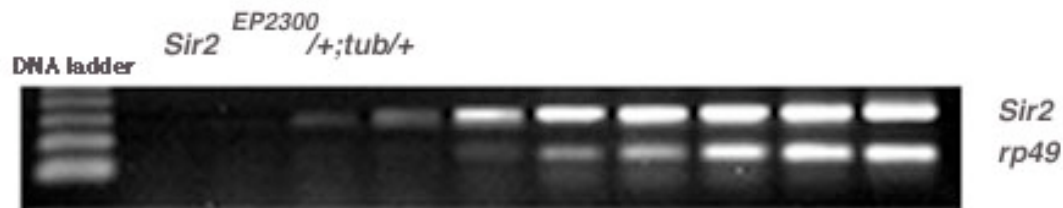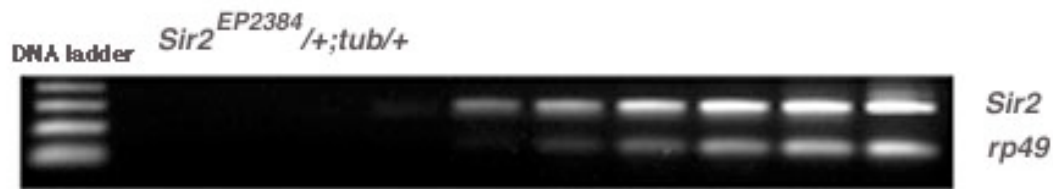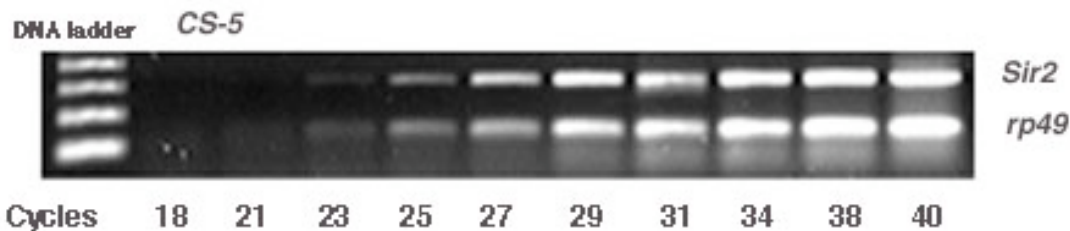

Supplement: pnas_101_45_15998__1.pdf [file pnas_101_45_15998__1.pdf]

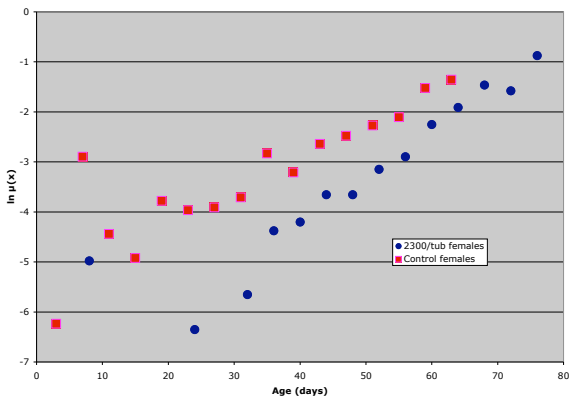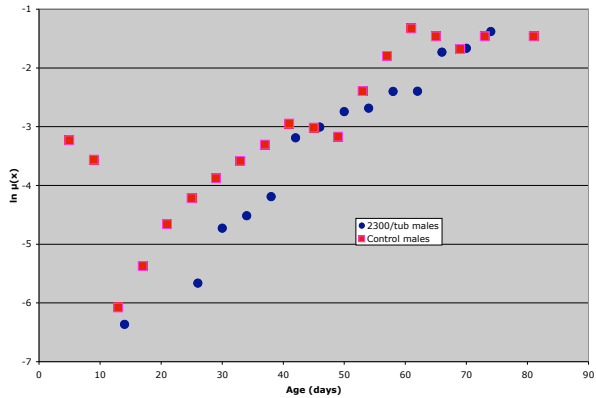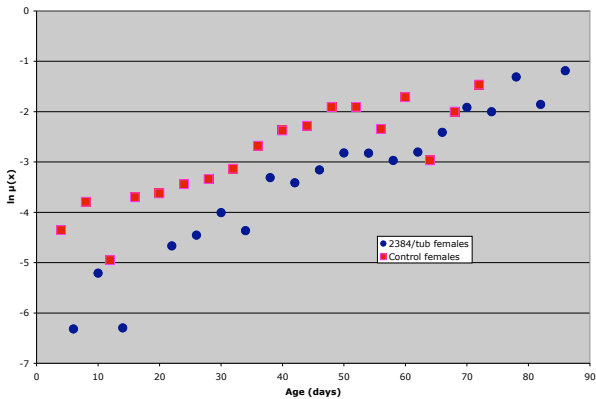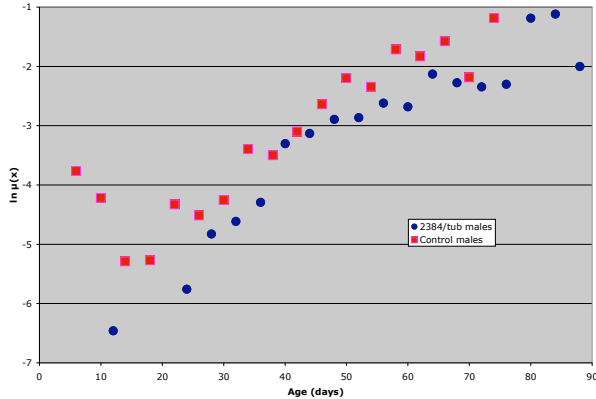

Supplement: pnas_101_45_15998__3.pdf [file pnas_101_45_15998__3.pdf]

**a**

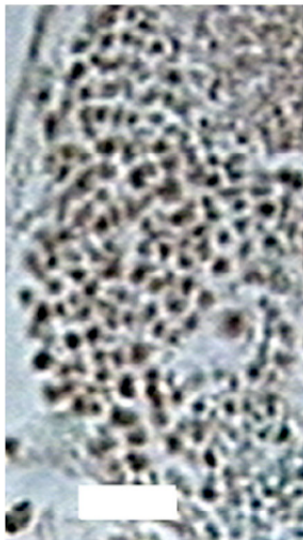

**b**

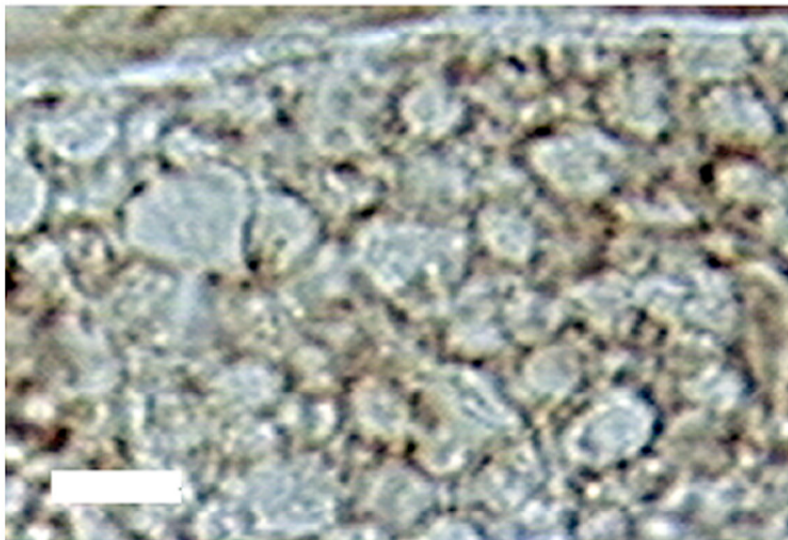

Supplement: pnas_101_45_15998__4.pdf [file pnas_101_45_15998__4.pdf]
